# Supplementary material for: AZIN1 RNA editing confers cancer stemness and enhances oncogenic potential in colorectal cancer
Source: JCI journal article supplement (doi:10.1172/jci.insight.99976), 2018-06-20
Supplement: sd1 [file 1]

**Supplementary Table 1: Clinicopathological features of all patients from each CRC cohorts**

| Characteristics   |                  | CRC<br>Testing cohort | CRC<br>Validation cohort | CRC<br>Clinical evaluation<br>cohort |
|-------------------|------------------|-----------------------|--------------------------|--------------------------------------|
|                   |                  | n=24                  | n=50                     | n=220                                |
| Gender            | Male             | 14                    | 30                       | 129                                  |
|                   | Female           | 10                    | 20                       | 91                                   |
| Age (y)           | Mean (SD)        | -                     | 66.3 (12.1)              | 67.2 (11.8)                          |
|                   | Median (Min-Max) | -                     | 67 (33–91)               | 69 (12–91)                           |
| Tumor location    | Colon            | 19                    | 31                       | 155                                  |
|                   | Rectum           | 5                     | 19                       | 65                                   |
| Histological type | Differentiated   | 23                    | 47                       | 198                                  |
|                   | Undifferentiated | 1                     | 3                        | 22                                   |
| TNM stage         | I                | 3                     | 8                        | 40                                   |
|                   | II               | 8                     | 16                       | 61                                   |
|                   | III              | 10                    | 15                       | 53                                   |
|                   | IV               | 3                     | 11                       | 66                                   |

## Supplementary Table 2: Primer sequences for PCR

| Primers for RNA editing site-specific quantitative PCR (RESSqPCR) |                                                                             |
|-------------------------------------------------------------------|-----------------------------------------------------------------------------|
| Gene                                                              | Primer sequence                                                             |
| <i>Wild-type AZIN1</i>                                            | Forward: CATTGAGCTCAGGAAGAAGACATCT<br>Reverse: AATACAAGGAAGATGAGCCTCTGTTTAC |
| <i>Edited AZIN1</i>                                               | Forward: ACTGAATGACATCATGTAATAAATGGCT<br>Reverse: GAGCTTGATCAAATTGTGGCAG    |
| Primers for qRT-PCR                                               |                                                                             |
| Gene                                                              | Primer sequence                                                             |
| ADAR1                                                             | Forward: CCCTTCAGCCACATCCTTC<br>Reverse: GCCATCTGCTTTGCCACTT                |
| ADAR2                                                             | Forward: CTGACACGCTTTCAATGGTT<br>Reverse: GGCGCAGTTCGTTCAAGAT               |
| OCT4                                                              | Forward: ACATCAAAGCTCTGCAGAAAGAACT<br>Reverse: CTGAATACCTTCCCAAATAGAACCC    |
| SOX2                                                              | Forward: CGCCGCCCCAGCAGACTTCACAT<br>Reverse: TGCACCCCTCCCATTTCCCTCGTT       |
| GAPDH                                                             | Forward: CTGACCACCAACTGCTTAG<br>Reverse: GTCTTCTGGGTGGCAGTGAT               |

**Supplementary Table 3: Clinicopathological variables and expression status of ADAR1 in the clinical evaluation cohort**

| Variable                |                  | n   | ADAR1 expression |                | p value        |
|-------------------------|------------------|-----|------------------|----------------|----------------|
|                         |                  |     | High<br>(n=106)  | Low<br>(n=114) |                |
| Gender                  | Male             | 129 | 71               | 58             | <b>0.016*</b>  |
|                         | Female           | 91  | 35               | 56             |                |
| Age (y)                 | <69 <sup>#</sup> | 109 | 56               | 53             | 0.35           |
|                         | ≥69              | 111 | 50               | 61             |                |
| Location                | Colon            | 155 | 76               | 79             | 0.7            |
|                         | Rectum           | 65  | 30               | 35             |                |
| Histological type       | Differentiated   | 198 | 95               | 103            | 0.86           |
|                         | Undifferentiated | 22  | 11               | 11             |                |
| Pathological T category | pT1/2            | 50  | 19               | 31             | 0.1            |
|                         | pT3/4            | 170 | 87               | 83             |                |
| Lymph vessel invasion   | Absent           | 21  | 8                | 13             | 0.33           |
|                         | Present          | 199 | 98               | 101            |                |
| Vascular invasion       | Absent           | 51  | 25               | 26             | 0.89           |
|                         | Present          | 169 | 81               | 88             |                |
| Lymph node metastasis   | Absent           | 122 | 54               | 68             | 0.2            |
|                         | Present          | 98  | 52               | 46             |                |
| Hepatic metastasis      | Absent           | 174 | 76               | 98             | <b>0.0095*</b> |
|                         | Present          | 46  | 30               | 16             |                |
| Distant metastasis      | Absent           | 154 | 66               | 88             | <b>0.016*</b>  |
|                         | Present          | 66  | 40               | 26             |                |
| UICC TNM classification | Stage I          | 40  | 15               | 25             | <b>0.025*</b>  |
|                         | Stage II         | 61  | 28               | 33             |                |
|                         | Stage III        | 53  | 23               | 30             |                |
|                         | Stage IV         | 66  | 40               | 26             |                |

<sup>#</sup> The median age at surgery is 69 years in this cohort.

\* p<0.05

# Supplementary Figure 1

**A**

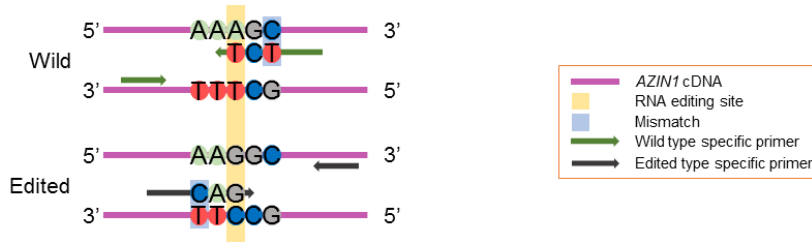

**B**

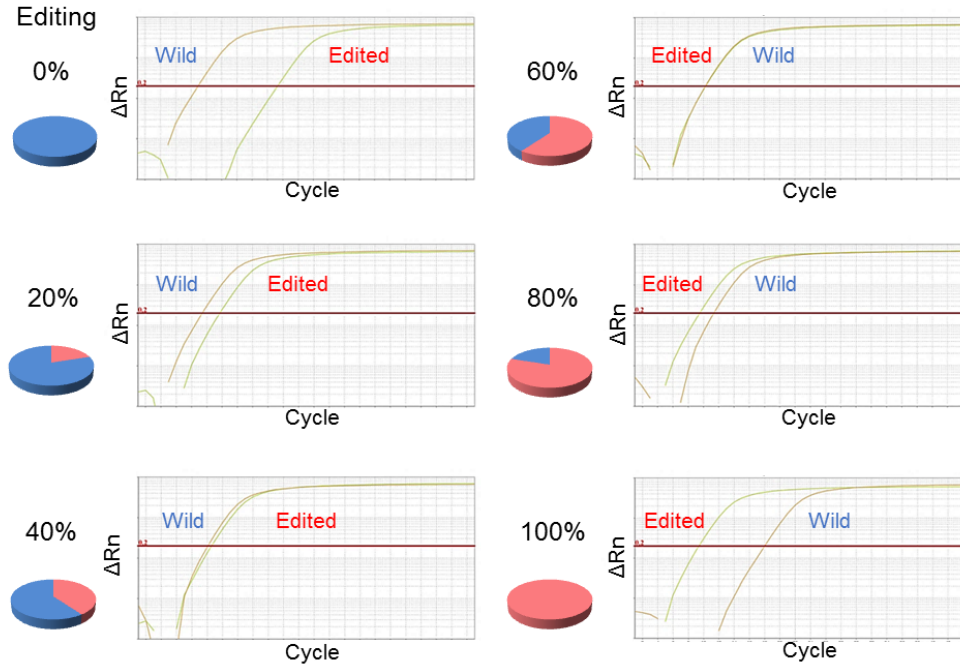

**C**

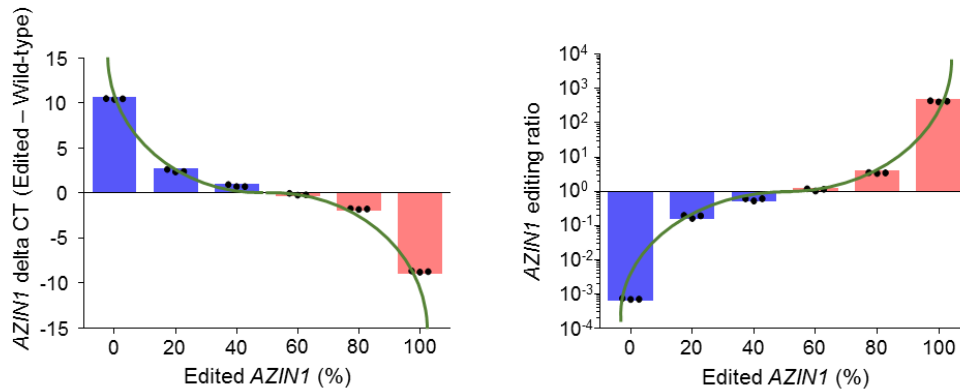

## Supplementary Figure 1: RESSq-PCR can efficiently discriminate between wild-type and edited AZIN1 RNA.

(A) Primer design for AZIN1 RNA edited site-specific quantitative PCR (RESSq-PCR) (B, C) The reliability of RESSq-PCR for assessment of AZIN1 RNA editing levels was examined using predetermined mixtures of oligonucleotides derived from wild-type or edited AZIN1 sequences, ranging from 0 to 100%.

## Supplementary Figure 2

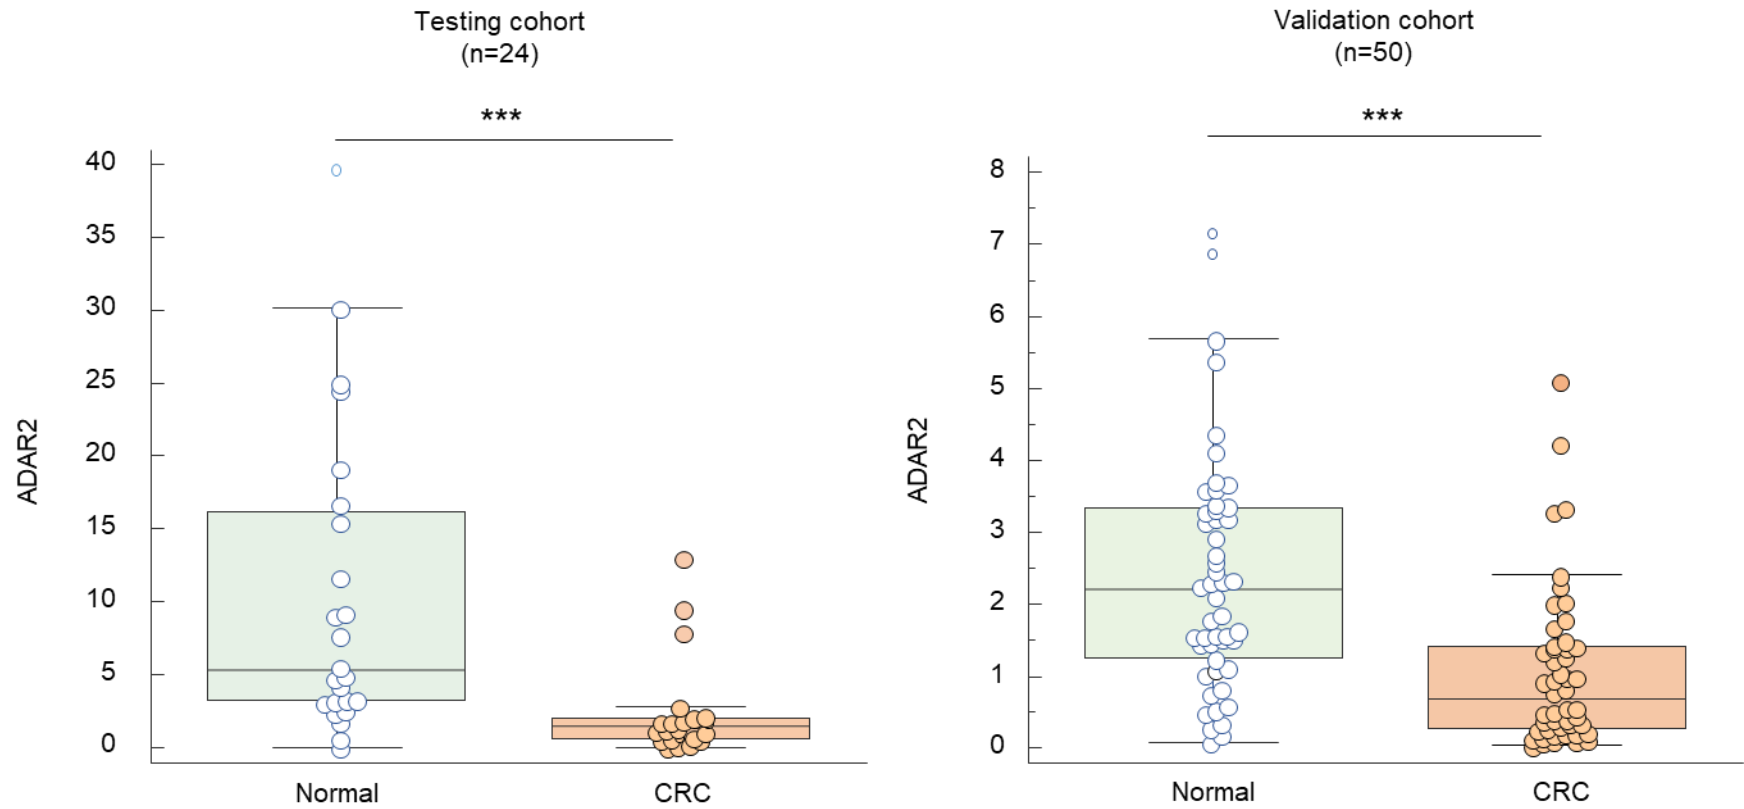

**Supplementary Figure 2: Decreased levels of ADAR2 in CRC**

The expression level of ADAR2 was significantly downregulated in CRC tissues compared with normal mucosa ( $p < 0.0001$  in both cohorts). \*\*\* $p < 0.001$ , Wilcoxon's signed rank test.

# Supplementary Figure 3

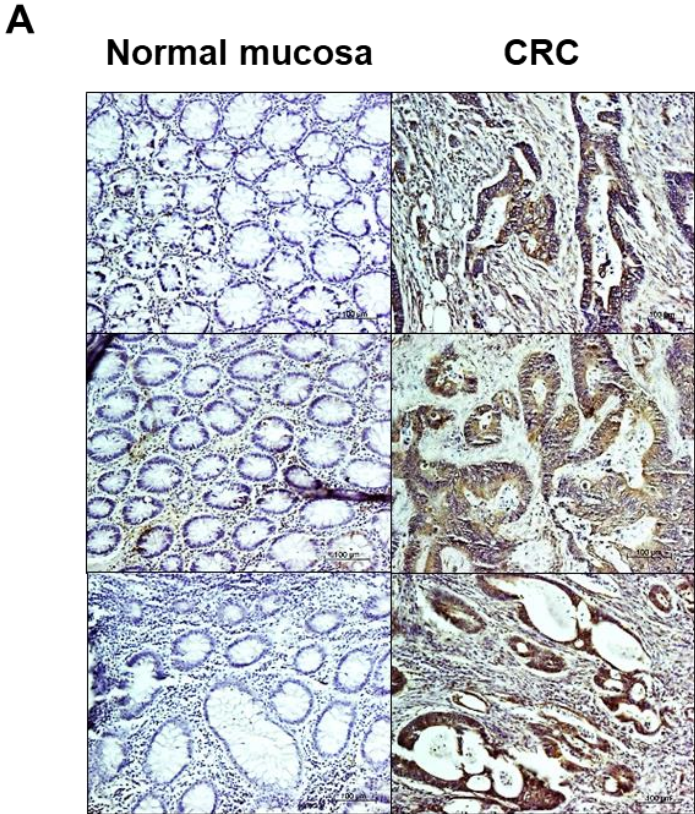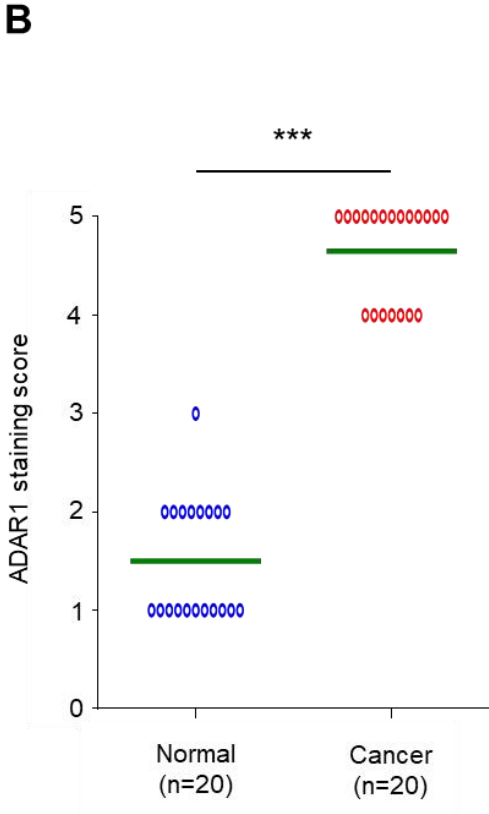

Supplementary Figure 3: Increased levels of ADAR1 protein in CRC tissues.

(A) Immunohistochemical analysis of ADAR1 protein in CRC tissues and normal mucosa. (B) Staining scores used to determine the level of ADAR1 expression in the tissues ( $p < 0.001$ ). \*\*\* $p < 0.001$ , Wilcoxon rank sum test.

## Supplementary Figure 4

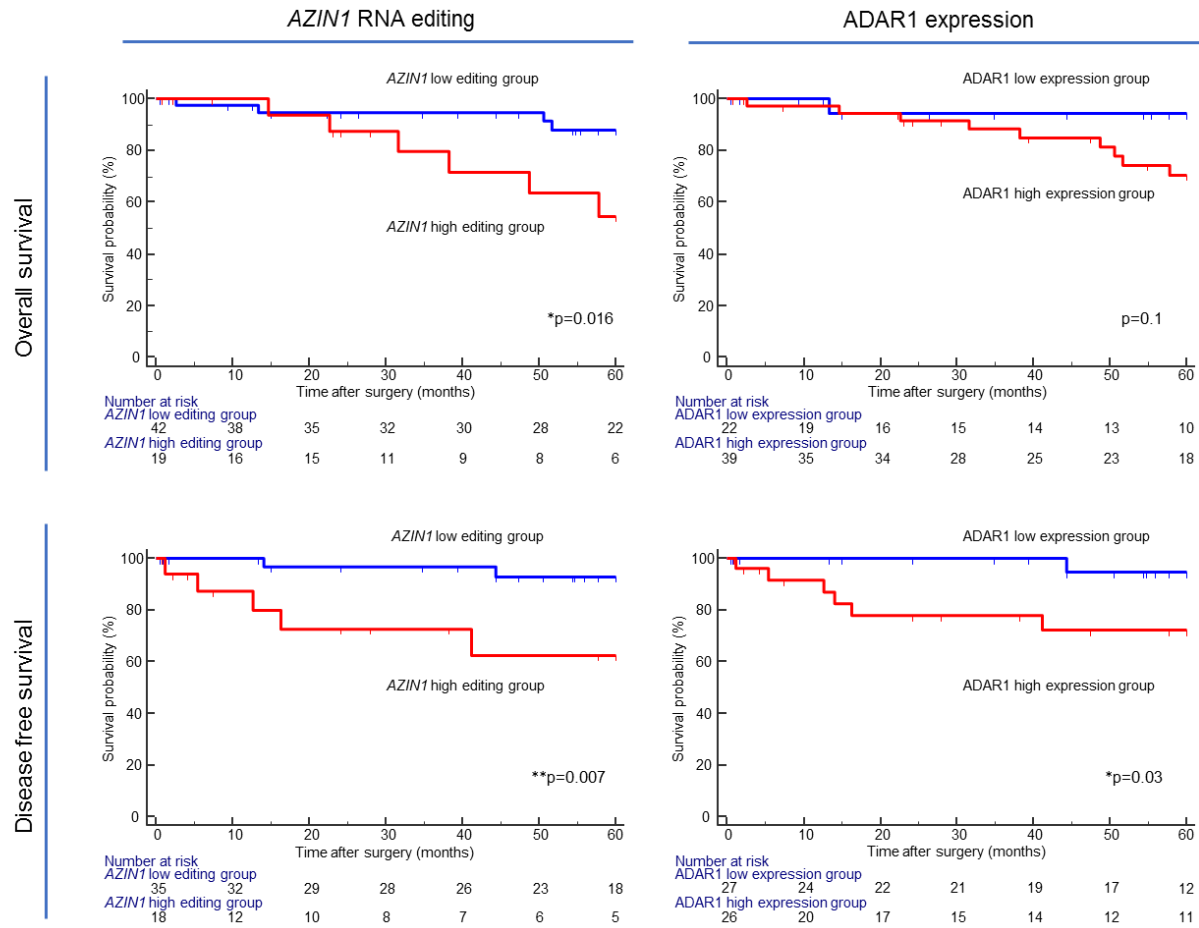

**Supplementary Figure 4:** Increased levels of edited *AZIN1* RNA and ADAR1 expression levels both correlate with shorter OS and DFS in Stage II CRC patients

Kaplan-Meier survival analysis in Stage II CRC patients based on *AZIN1* RNA editing status and expression status of ADAR1 in primary CRC tissues. \*p<0.05, \*\*p<0.01, Log-rank test.

## Supplementary Figure 5

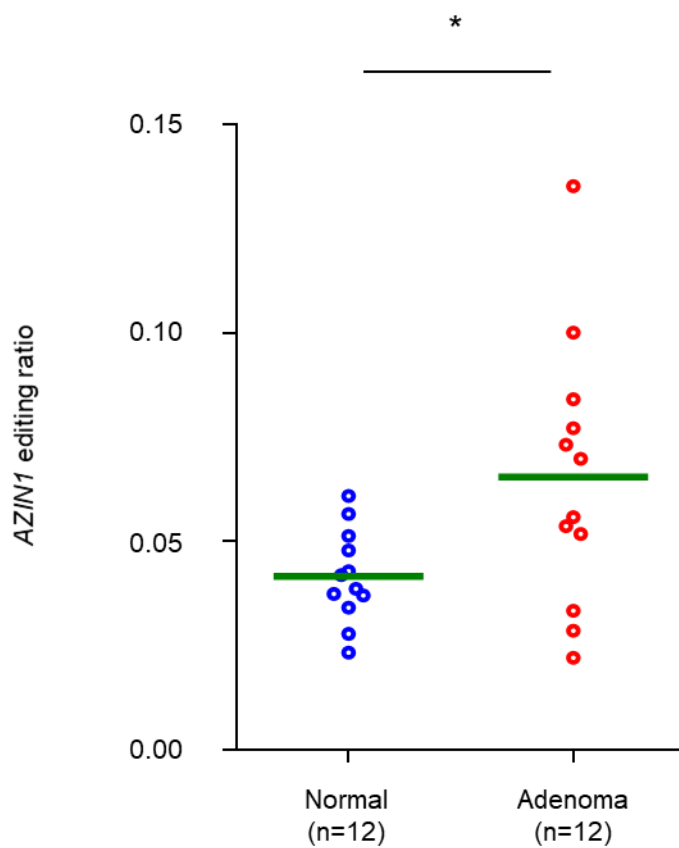

**Supplementary Figure 5:** Increased levels of edited *AZIN1* RNA in colorectal adenoma.

RESSq-PCR analysis to determine edited *AZIN1* RNA levels in colorectal adenoma compared with adjacent normal mucosa (p=0.016). \*p<0.05, Wilcoxon rank sum test.



Supplementary Figure 6

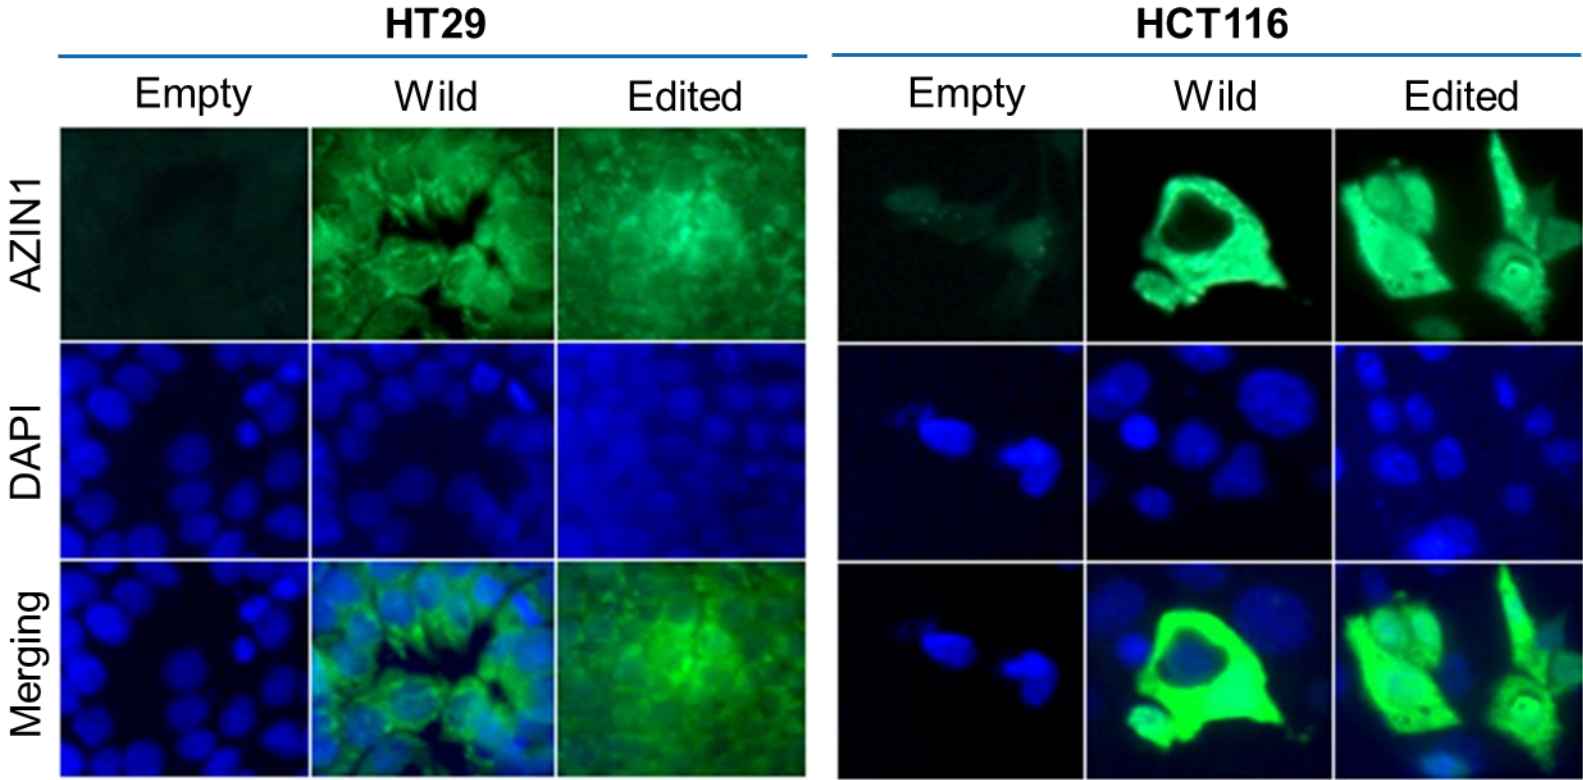

Supplementary Figure 6: Immunofluorescence analysis of CRC cell lines transfected with empty, wild-type, or edited *AZIN1* vector.

Wild-type *AZIN1* is mainly located in cytoplasm, while edited *AZIN1* is seen in both nucleus and cytoplasm in immunofluorescence staining (x400, green: *AZIN1*, blue: DAPI).
